# Supplementary material
Source: PubMed Central journal article supplement (PMC3230937)
Supplement: NIHMS335874-supplement-Figures.pdf [file NIHMS335874-supplement-Figures.pdf]

**Supp. Figure S1.** Log R Ratio (LRR), B Allele Frequency (BAF), algorithm and MLPA callings and MLPA peaks for A) a true positive duplication, B) a true positive homozygous deletion, C) a false negative heterozygous deletion and D) a false positive duplication. MLPA peaks are shown for the considering individual and for various probes used for validation.

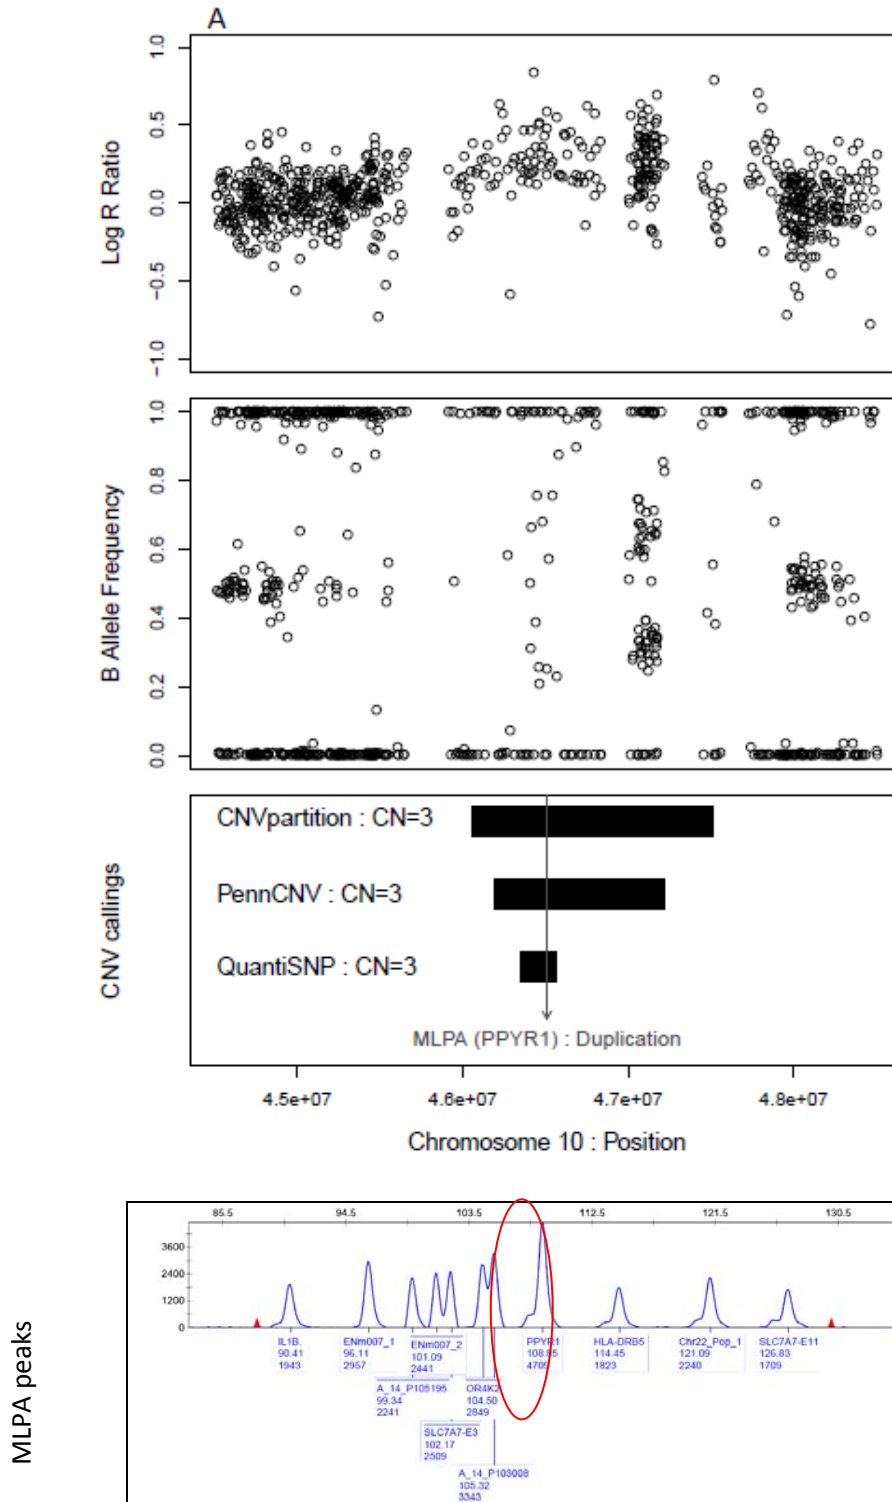

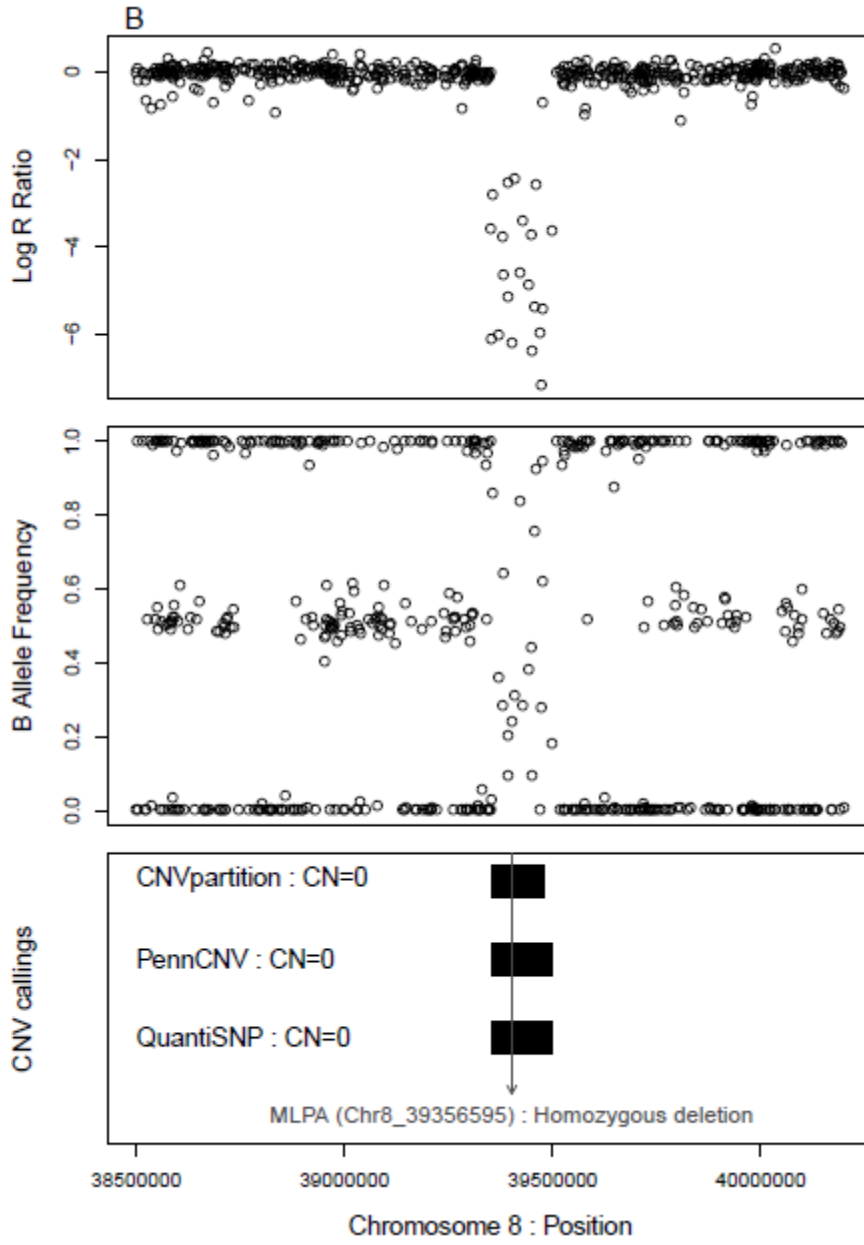

MLPA peaks

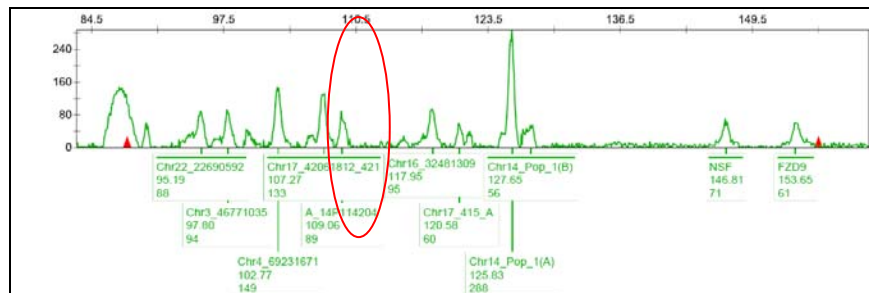

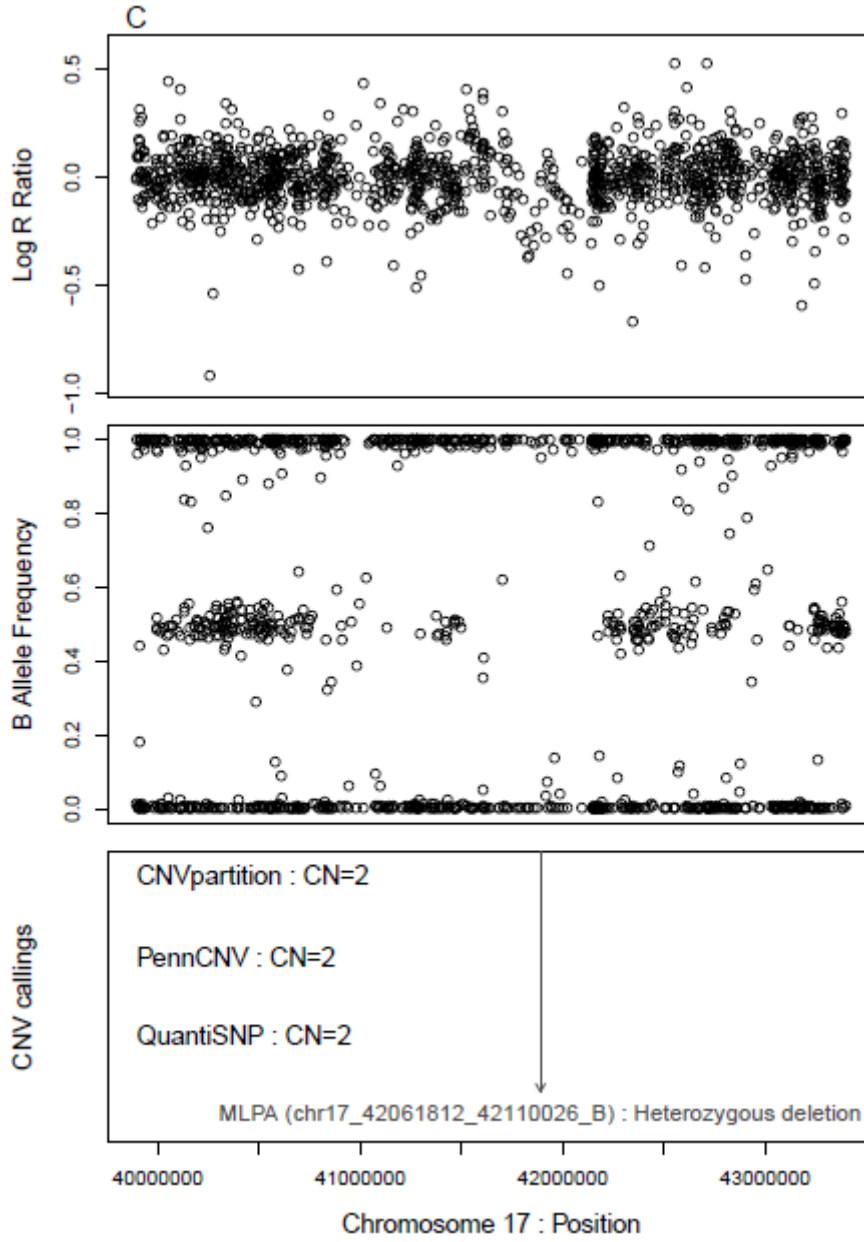

MLPA peaks

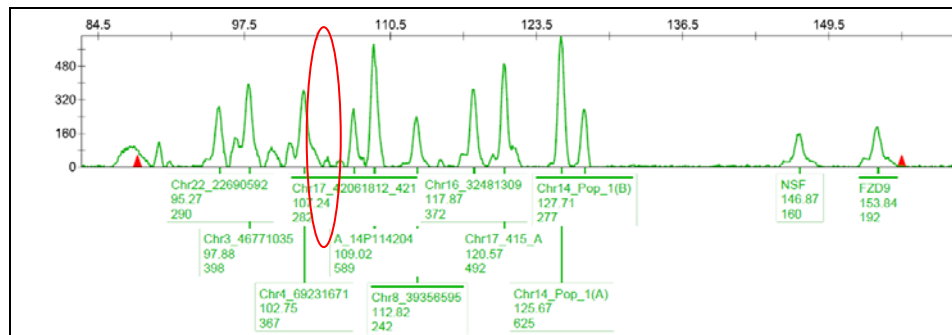

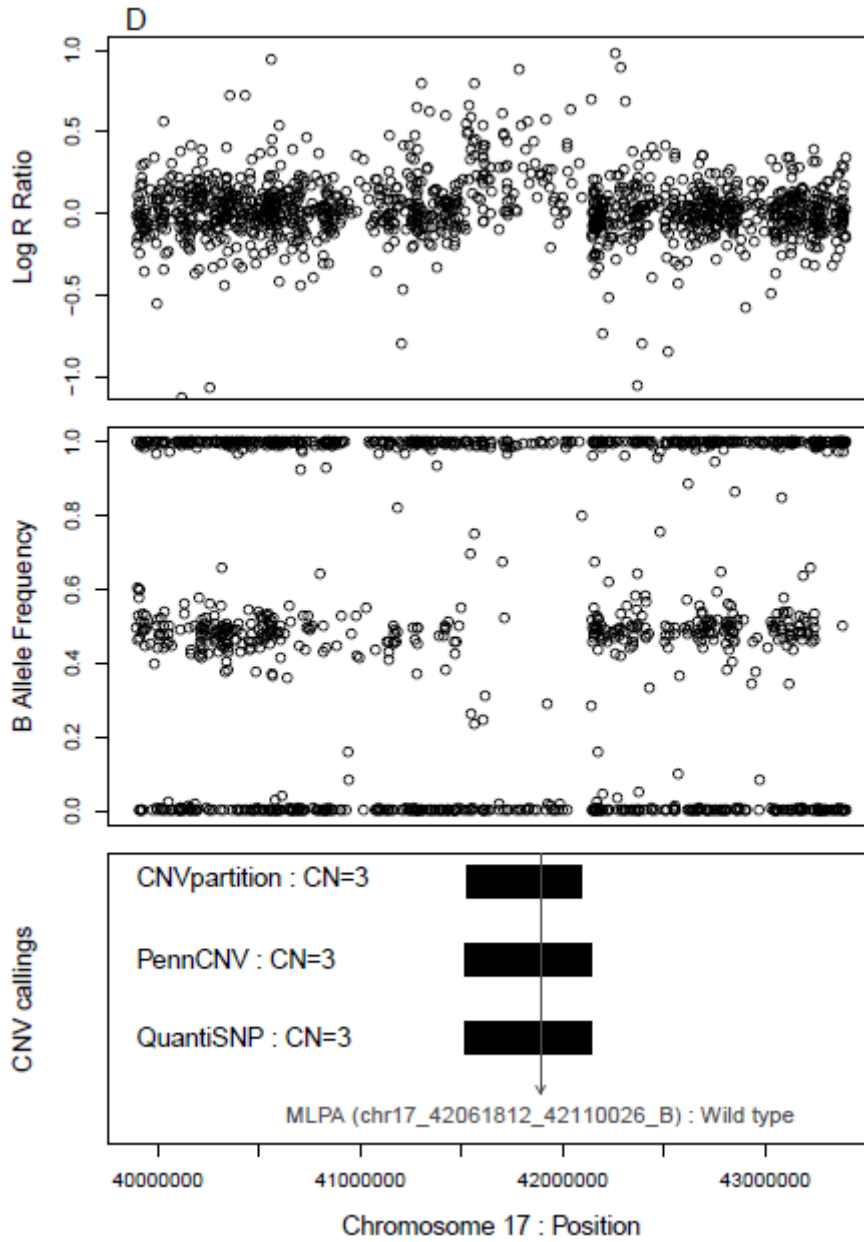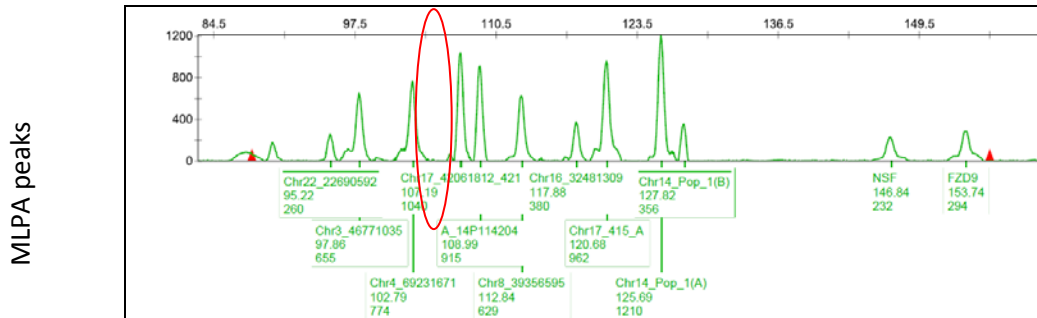

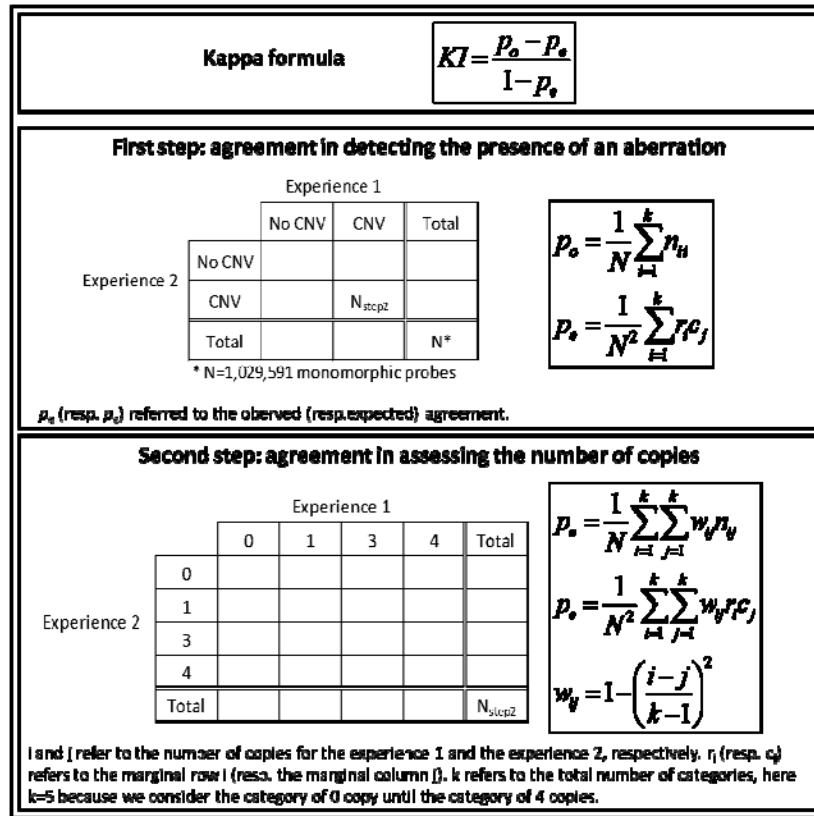

**Supp. Figure S2.** Detail of the kappa calculation for the two-step agreement on calling CNVs.

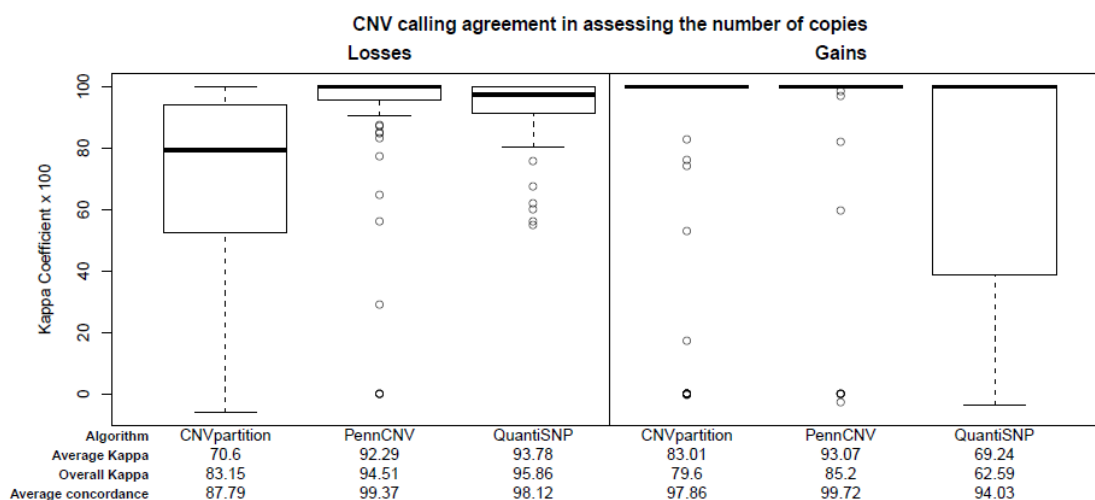

**Supp. Figure S3.** Agreement on assessing the number of copies once the type of CNV (loss or gain) was concordant for both replicates. For each type of CNV and each algorithm, we computed 1) the Kappa coefficient for each pair of duplicate and we provided the average Kappa across the 96 pairs, 2) a overall Kappa coefficient computed over all the 96 pairs of replicates and concordant probes, and 3) the classic concordance rate for each pair of duplicate and we provided the average concordance across the 96 pairs.

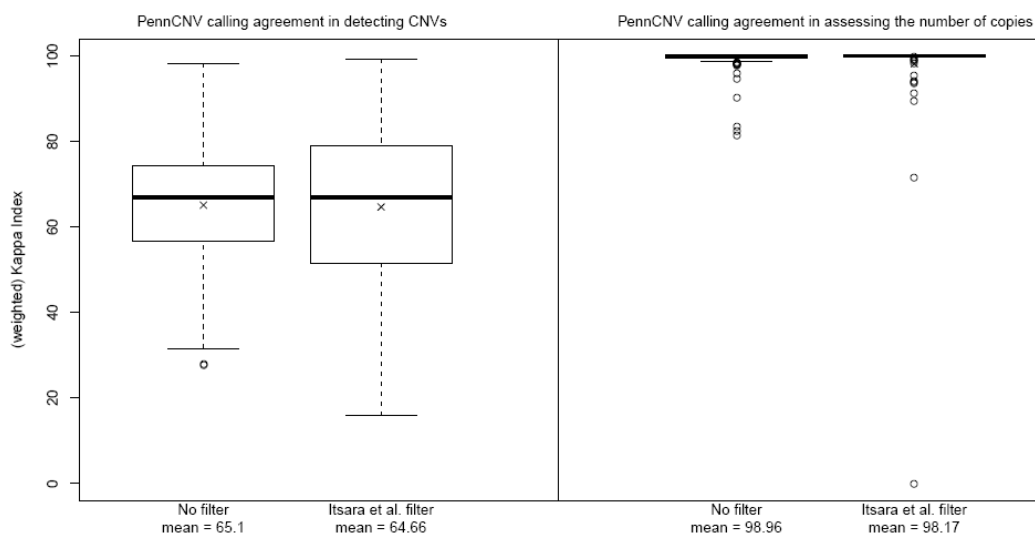

**Supp. Figure S4.** Impact of the filtering on PennCNV calling agreement. Box plots before and after filtering for the distribution of A) Kappa Index estimates for CNV detection on duplicated samples, and B) weighted Kappa Index estimates for copy-number assessment when a CNV was detected.

**Supp. Table S1. Number of Individuals, assays, and pairs analyzed (before CNV criteria) and considered in the accuracy study (after CNV criteria) and according to DNA source**

| Overall                    |        |       | Blood       |        |       | Saliva      |        |       | Blood / Saliva |          |       |
|----------------------------|--------|-------|-------------|--------|-------|-------------|--------|-------|----------------|----------|-------|
| Individuals                | Assays | Pairs | Individuals | Assays | Pairs | Individuals | Assays | Pairs | Individuals    | Assays   | Pairs |
| <b>Before CNV criteria</b> |        |       |             |        |       |             |        |       |                |          |       |
| 141                        | 299    | 178   | 71          | 142    | 71    | 66          | 146    | 97    | 4              | 11       | 10    |
| 127 dup                    |        |       | 71 dup      |        |       | 55 dup      |        |       | 1 dup          | 5 Blood  | 1 B/B |
| 11 trip                    |        |       |             |        |       | 8 trip      |        |       | 3 trip         | 6 Saliva | 2 S/S |
| 3 quadrip                  |        |       |             |        |       | 3 quadrip   |        |       |                |          | 7 B/S |
| <b>After CNV criteria</b>  |        |       |             |        |       |             |        |       |                |          |       |
| 92                         | 186    | 96    | 63          | 126    | 63    | 29          | 60     | 33    | -              | -        | -     |
| 90 dup                     |        |       | 63 dup      |        |       | 27 dup      |        |       |                |          |       |
| 2 trip                     |        |       |             |        |       | 2 trip      |        |       |                |          |       |

Assays are count by summing all duplicate, triplicate and quadruplicate samples

Pairs refer to the by-two comparisons provided by duplicate (2), triplicate (3) and quadruplicate (6) samples.

**Supp. Table S2. MLPA probes considered in the MLPA analysis**

| <b>Probe</b>              | <b>Chromosome</b> | <b>Band</b> | <b>Start</b> | <b>End</b>  |
|---------------------------|-------------------|-------------|--------------|-------------|
| SKI                       | 1                 | 1p36.33     | 2,150,969    | 2,151,029   |
| IL1B                      | 2                 | 2q13        | 113,306,801  | 113,306,852 |
| A_14_P103008              | 2                 | 2q37.3      | 242,228,984  | 242,229,042 |
| PLCD1                     | 3                 | 3p22.3      | 38,026,650   | 38,026,709  |
| Chr3_46771035             | 3                 | 3p21.31     | 46,781,196   | 46,781,253  |
| Chr4_69231671             | 4                 | 4q13.2      | 69,109,638   | 69,109,698  |
| PCDHA9                    | 5                 | 5q31.1      | 140,208,267  | 140,208,335 |
| DOM3Z                     | 6                 | 6p21.32     | 32,047,183   | 32,047,228  |
| HLA-DRB5                  | 6                 | 6p21.32     | 32,593,310   | 32,593,379  |
| FZD9                      | 7                 | 7q11.23     | 72,294,840   | 72,294,901  |
| Chr8_39356595             | 8                 | 8p11.23     | 39,401,744   | 39,401,802  |
| RXRa                      | 9                 | 9q34.2      | 136,453,357  | 136,453,414 |
| NOTCH1                    | 9                 | 9q34.3      | 138,523,724  | 138,523,783 |
| PPYR1                     | 10                | 10q11.22    | 46,507,740   | 46,507,809  |
| ADAM8                     | 10                | 10q26.3     | 134,933,411  | 134,933,468 |
| HRAS                      | 11                | 11p15.5     | 523,758      | 523,813     |
| A_14_P114204              | 11                | 11q13.1     | 66,952,984   | 66,953,039  |
| OR4K2                     | 14                | 14q11.2     | 19,414,387   | 19,414,452  |
| Chr16_32481309            | 16                | 16p11.2     | 32,516,918   | 32,516,977  |
| chr17_415_A               | 17                | 17q21.31    | 41,539,152   | 41,539,211  |
| chr17_42061812_42110026_B | 17                | 17q21.31    | 41,889,427   | 41,889,486  |
| NSF                       | 17                | 17q21.32    | 42,166,492   | 42,166,551  |
| STK11                     | 19                | 19p13.3     | 1,171,375    | 1,171,442   |
| ENm007_1                  | 19                | 19q13.42    | 59,427,206   | 59,427,263  |
| ENm007_2                  | 19                | 19q13.42    | 59,968,534   | 59,968,593  |
| A_14_P105195              | 20                | 20q11.21    | 30,111,471   | 30,111,530  |
| GSTT1                     | 22                | 22q11.23    | 22,706,190   | 22,706,250  |
| Chr22_22690592            | 22                | 22q11.23    | 22,709,442   | 22,709,496  |
| Chr22_Pop_1               | 22                | 22q13.1     | 37,684,655   | 37,684,714  |



**Supp. Table S3. Validity estimates for blood samples comparing the calling results with those obtained using MLPA as a reference**

| Steps     | CNV type                    |            | CNVpartition |               |                      |               | PennCNV   |               |                      |               | QuantiSNP |               |                      |               |
|-----------|-----------------------------|------------|--------------|---------------|----------------------|---------------|-----------|---------------|----------------------|---------------|-----------|---------------|----------------------|---------------|
|           |                             |            | No filter    |               | Itsara et al. filter |               | No filter |               | Itsara et al. filter |               | No filter |               | Itsara et al. filter |               |
|           |                             |            | Est.         | 95% CI        | Est.                 | 95% CI        | Est.      | 95% CI        | Est.                 | 95% CI        | Est.      | 95% CI        | Est.                 | 95% CI        |
| <b>1</b>  | <b>CNV</b>                  | <b>SE</b>  | 0.19         | [0.14 - 0.23] | 0.05                 | [0.03 - 0.08] | 0.23      | [0.18 - 0.28] | 0.07                 | [0.05 - 0.11] | 0.28      | [0.23 - 0.33] | 0.08                 | [0.05 - 0.11] |
|           |                             | <b>SP</b>  | 0.99         | [0.98 - 1.00] | 1.00                 | [1.00 - 1.00] | 0.98      | [0.97 - 0.99] | 1.00                 | [0.99 - 1.00] | 0.97      | [0.96 - 0.98] | 1.00                 | [0.99 - 1.00] |
|           |                             | <b>VPP</b> | 0.83         | [0.73 - 0.91] | 0.95                 | [0.75 - 1.00] | 0.76      | [0.66 - 0.85] | 0.86                 | [0.68 - 0.96] | 0.71      | [0.62 - 0.79] | 0.90                 | [0.73 - 0.98] |
|           |                             | <b>VPN</b> | 0.83         | [0.81 - 0.85] | 0.80                 | [0.78 - 0.82] | 0.84      | [0.83 - 0.86] | 0.81                 | [0.79 - 0.83] | 0.86      | [0.84 - 0.87] | 0.81                 | [0.79 - 0.83] |
| <b>2a</b> | <b>Deletion*</b>            | <b>SE</b>  | 0.97         | [0.86 - 1.00] | 1.00                 | [0.73 - 1.00] | 0.95      | [0.84 - 0.99] | 1.00                 | [0.79 - 1.00] | 0.98      | [0.91 - 1.00] | 1.00                 | [0.81 - 1.00] |
|           |                             | <b>SP</b>  | 1.00         | [0.79 - 1.00] | 1.00                 | [0.09 - 1.00] | 1.00      | [0.83 - 1.00] | 1.00                 | [0.09 - 1.00] | 0.92      | [0.73 - 0.99] | 1.00                 | [0.01 - 1.00] |
|           |                             | <b>VPP</b> | 1.00         | [0.86 - 1.00] | 1.00                 | [0.73 - 1.00] | 1.00      | [0.87 - 1.00] | 1.00                 | [0.79 - 1.00] | 0.97      | [0.88 - 1.00] | 1.00                 | [0.81 - 1.00] |
|           |                             | <b>VPN</b> | 0.96         | [0.79 - 1.00] | 1.00                 | [0.09 - 1.00] | 0.94      | [0.79 - 0.99] | 1.00                 | [0.09 - 1.00] | 0.96      | [0.78 - 1.00] | 1.00                 | [0.01 - 1.00] |
| <b>2b</b> | <b>Homozygous deletion*</b> | <b>SE</b>  | 1.00         | [0.83 - 1.00] | 1.00                 | [0.66 - 1.00] | 0.86      | [0.57 - 0.98] | 1.00                 | [0.64 - 1.00] | 0.68      | [0.45 - 0.86] | 1.00                 | [0.66 - 1.00] |
|           |                             | <b>SP</b>  | 0.94         | [0.79 - 0.99] | 1.00                 | [0.42 - 1.00] | 1.00      | [0.91 - 1.00] | 1.00                 | [0.66 - 1.00] | 0.92      | [0.82 - 0.97] | 1.00                 | [0.68 - 1.00] |
|           |                             | <b>VPP</b> | 0.94         | [0.79 - 0.99] | 1.00                 | [0.66 - 1.00] | 1.00      | [0.64 - 1.00] | 1.00                 | [0.64 - 1.00] | 0.75      | [0.51 - 0.91] | 1.00                 | [0.66 - 1.00] |
|           |                             | <b>VPN</b> | 1.00         | [0.83 - 1.00] | 1.00                 | [0.42 - 1.00] | 0.97      | [0.88 - 1.00] | 1.00                 | [0.66 - 1.00] | 0.89      | [0.78 - 0.95] | 1.00                 | [0.68 - 1.00] |

|           |                               |            | CNVpartition |               |                      |               | PennCNV   |               |                      |               | QuantiSNP |               |                      |               |
|-----------|-------------------------------|------------|--------------|---------------|----------------------|---------------|-----------|---------------|----------------------|---------------|-----------|---------------|----------------------|---------------|
|           |                               |            | No filter    |               | Itsara et al. filter |               | No filter |               | Itsara et al. filter |               | No filter |               | Itsara et al. filter |               |
| <b>2c</b> | <b>Heterozygous deletion*</b> | <b>SE</b>  | 0.63         | [0.24 - 0.91] | 1.00                 | [0.28 - 1.00] | 0.93      | [0.76 - 0.99] | 1.00                 | [0.62 - 1.00] | 0.92      | [0.78 - 0.98] | 1.00                 | [0.66 - 1.00] |
|           |                               | <b>SP</b>  | 1.00         | [0.9 - 1.00]  | 1.00                 | [0.7 - 1.00]  | 0.95      | [0.84 - 0.99] | 1.00                 | [0.68 - 1.00] | 0.87      | [0.74 - 0.95] | 1.00                 | [0.68 - 1.00] |
|           |                               | <b>VPP</b> | 1.00         | [0.36 - 1.00] | 1.00                 | [0.28 - 1.00] | 0.93      | [0.76 - 0.99] | 1.00                 | [0.62 - 1.00] | 0.85      | [0.7 - 0.94]  | 1.00                 | [0.66 - 1.00] |
|           |                               | <b>VPN</b> | 0.95         | [0.85 - 0.99] | 1.00                 | [0.7 - 1.00]  | 0.95      | [0.84 - 0.99] | 1.00                 | [0.68 - 1.00] | 0.93      | [0.81 - 0.99] | 1.00                 | [0.68 - 1.00] |
| <b>2d</b> | <b>Duplication*</b>           | <b>SE</b>  | 1.00         | [0.79 - 1.00] | 1.00                 | [0.09 - 1.00] | 1.00      | [0.83 - 1.00] | 1.00                 | [0.09 - 1.00] | 0.92      | [0.73 - 0.99] | 1.00                 | [0.01 - 1.00] |
|           |                               | <b>SP</b>  | 0.97         | [0.86 - 1.00] | 1.00                 | [0.73 - 1.00] | 0.95      | [0.84 - 0.99] | 1.00                 | [0.79 - 1.00] | 0.98      | [0.91 - 1.00] | 1.00                 | [0.81 - 1.00] |
|           |                               | <b>VPP</b> | 0.96         | [0.79 - 1.00] | 1.00                 | [0.09 - 1.00] | 0.94      | [0.79 - 0.99] | 1.00                 | [0.09 - 1.00] | 0.96      | [0.78 - 1.00] | 1.00                 | [0.01 - 1.00] |
|           |                               | <b>VPN</b> | 1.00         | [0.86 - 1.00] | 1.00                 | [0.73 - 1.00] | 1.00      | [0.87 - 1.00] | 1.00                 | [0.79 - 1.00] | 0.97      | [0.88 - 1.00] | 1.00                 | [0.81 - 1.00] |

\*Estimates for each CNV type were calculated only for these true positive CNVs identified in step 1.

The estimates and their 95% confidence intervals (CI) for sensitivity (SE), specificity (SP), positive predictive value (VPP) and negative predictive value (VPN) are displayed according to the algorithms and the different types of aberrations with and without filtering using the Itsara et al. criteria.
